# Supplementary material for: Multifaceted intervention to reduce haemodialysis catheter related bloodstream infections: REDUCCTION stepped wedge, cluster randomised trial
Source: PubMed Central journal article supplement (PMC9002320; doi:10.1136/bmj-2021-069634), 2022-04-12
Supplement: kots069634.ww.pdf [file kots069634.ww.pdf]

**A multi-faceted intervention to reduce haemodialysis catheter-related blood stream infections: a cluster randomised trial – Online Appendix****1 Table of Contents**

|     |                                                                                            |    |
|-----|--------------------------------------------------------------------------------------------|----|
| 2   | Study Investigators.....                                                                   | 2  |
| 2.1 | List of Trial Investigators .....                                                          | 2  |
| 2.2 | Steering committee members .....                                                           | 6  |
| 2.3 | Trial Executive Management Committee members .....                                         | 6  |
| 2.4 | Data Collection Sub-committee members.....                                                 | 6  |
| 2.5 | Engagement Sub-committee members .....                                                     | 6  |
| 2.6 | Interventions Sub-committee members.....                                                   | 6  |
| 2.7 | Study Adjudicators .....                                                                   | 6  |
| 3   | Statistical methods.....                                                                   | 7  |
| 3.1 | Randomisation methods.....                                                                 | 7  |
| 3.2 | Details of Statistical Analysis.....                                                       | 7  |
| 4   | Trial interventions.....                                                                   | 9  |
| 4.1 | Details of trial interventions .....                                                       | 9  |
| 4.2 | Intervention implementation .....                                                          | 9  |
| 5   | Lay Summary.....                                                                           | 10 |
| 6   | Figures.....                                                                               | 11 |
| 6.1 | Figure e1 - Trial Flow Chart .....                                                         | 11 |
| 7   | Appendix tables .....                                                                      | 12 |
| 7.1 | Table e1 – Participating and Contributing entities .....                                   | 12 |
| 7.2 | Table e2 – Renal Service characteristics by their phase of randomisation .....             | 14 |
| 7.3 | Table e3 – Reasons for haemodialysis catheter removal .....                                | 15 |
| 7.4 | Table e4 – Unadjusted rates of all primary and secondary trial outcomes by trial phase ... | 16 |
| 7.5 | Table e5 – Sub-group analyses.....                                                         | 17 |
| 8   | References .....                                                                           | 18 |

## 2 Study Investigators

### 2.1 List of Trial Investigators

| Institution            | First name    | Last name     |
|------------------------|---------------|---------------|
| Alice Springs Hospital | Senthil Kumar | Balakrishnan  |
| Alice Springs Hospital | David         | Fernandes     |
| Armadale Hospital      | Hemant        | Kulkarni      |
| Armadale Hospital      | Casey         | Light         |
| Armadale Hospital      | Jo            | Ryan          |
| Auckland Hospital      | Emma          | Marsh         |
| Auckland Hospital      | David         | Semple        |
| Alfred Health          | Omar          | Tombocon      |
| Alfred Health          | Rowan         | Walker        |
| Alfred Health          | Scott         | Wilson        |
| Austin Health          | Vilma         | Lleva         |
| Austin Health          | Lucy          | Mwangi        |
| Austin Health          | Peter         | Mount         |
| Austin Health          | Maree         | Ross-Smith    |
| Austin Health          | Marieke       | Veenendaal    |
| Barwon Health          | Vicki         | Smith         |
| Barwon Health          | Christine     | Somerville    |
| Cairns Hospital        | Shaun         | Davidson-West |
| Cairns Hospital        | Natalie       | Grainer       |
| Cairns Hospital        | Stella        | Green         |
| Cairns Hospital        | Murty         | Mantha        |
| Cairns Hospital        | Kati          | Thiessen      |
| Canberra Hospital      | Girish        | Talaulikar    |
| Canberra Hospital      | Alison        | Winsbury      |
| Canberra Hospital      | Irene         | Yao           |
| Canberra Hospital      | Emily         | Neville       |
| CARI                   | Pamela        | Lopez-Vargas  |
| Concord Hospital       | Khalilah      | Marquez       |
| Concord Hospital       | Mona          | Razavian      |
| Concord Hospital       | Lisa          | Tienstra      |
| Concord Hospital       | Glenn         | Stewart       |
| Eastern Health         | Cathy         | Chan          |
| Eastern Health         | Peta          | McLean        |
| Eastern Health         | Lawrence      | McMahon       |
| Eastern Health         | Matthew       | Roberts       |
| Eastern Health         | Dong          | Wang          |
| Fiona Stanley Hospital | Monika        | Chang         |
| Fiona Stanley Hospital | Anna          | Chiam         |
| Fiona Stanley Hospital | Duncan        | Wright        |
| Fiona Stanley Hospital | Orla          | O'Brien       |
| Fiona Stanley Hospital | Ramyasuda     | Swaminathan   |

| Institution                            | First name    | Last name    |
|----------------------------------------|---------------|--------------|
| Fiona Stanley Hospital                 | Samadhi       | Wimalasena   |
| Fiona Stanley Hospital                 | Harish        | Puttagunta   |
| Flinders Medical Centre                | Jeffrey       | Barbara      |
| Flinders Medical Centre                | Amanda        | Luke         |
| Flinders Medical Centre                | Margaret      | Pummeroy     |
| Flinders Medical Centre                | Kim           | Torpey       |
| Gold Coast Hospital and Health Service | Gemma         | Nicholls     |
| Gold Coast Hospital and Health Service | Amy           | Swinbank     |
| Gold Coast Hospital and Health Service | Thomas        | Titus        |
| John Hunter Hospital                   | Peter         | Choi         |
| John Hunter Hospital                   | Ginger        | Chu          |
| John Hunter Hospital                   | Leanne        | Garvey       |
| John Hunter Hospital                   | Alastair      | Gillies      |
| Kidney Health Australia                | Shilpa        | Jesudason    |
| Liverpool Hospital                     | Josephine     | Chow         |
| Liverpool Hospital                     | Imelda        | De Guzman    |
| Liverpool Hospital                     | Jeanny        | Gando        |
| Liverpool Hospital                     | Jeffrey       | Wong         |
| Liverpool Hospital                     | Richard       | Nguyen       |
| Mackay Hospital                        | Roy           | Cherian      |
| Mackay Hospital                        | Raye          | Gillard      |
| Mackay Hospital                        | Rachel        | James        |
| Mater Hospital                         | Michael       | Burke        |
| Mater Hospital                         | Leanne        | Glancy       |
| Mater Hospital                         | Shimbie       | Lewis        |
| Mater Hospital                         | Richard       | Baer         |
| Mater Hospital                         | Sophie        | Wade         |
| Monash Health                          | Kate          | Fitt         |
| Monash Health                          | Peter         | Kerr         |
| Monash Health                          | Kevan         | Polkinghorne |
| Monash Health                          | Mechelle      | Seneviratne  |
| Nepean Hospital                        | Muralikrishna | Komala       |
| Nepean Hospital                        | Junie         | McCourt      |
| Nepean Hospital                        | Craig         | Lawlor       |
| Ipswich Hospital                       | Julia         | Bell         |
| Ipswich Hospital                       | David         | Johnson      |
| Prince of Wales Hospital               | Michaela      | Kelleher     |
| Prince of Wales Hospital               | Sradha        | Kotwal       |
| Princess Alexandra Hospital            | Amanda        | Coburn       |
| Princess Alexandra Hospital            | Sarah         | Guo          |
| Princess Alexandra Hospital            | David         | Johnson      |
| Princess Alexandra Hospital            | Joanna        | Sudak        |
| Princess Alexandra Hospital            | Diana         | Leary        |
| Rockhampton Hospital                   | Jenny         | Anderson     |

| Institution                                | First name    | Last name      |
|--------------------------------------------|---------------|----------------|
| Rockhampton Hospital                       | Thin          | Han            |
| Rockhampton Hospital                       | Tresna        | Titmarsh       |
| Royal Adelaide Hospital                    | Emily         | Adam           |
| Royal Adelaide Hospital                    | Bronwyn       | Hockley        |
| Royal Adelaide Hospital                    | Jenny         | Latte          |
| Royal Adelaide Hospital                    | Yvonne        | Matthew        |
| Royal Adelaide Hospital                    | Stephen       | McDonald       |
| Royal Adelaide Hospital                    | Chen Au       | Peh            |
| Royal Adelaide Hospital                    | Rebecca       | Taylor         |
| Royal Brisbane Hospital                    | David         | McIntyre       |
| Royal Brisbane Hospital                    | Sharadchandra | Ratanjee       |
| Royal Darwin Hospital                      | Karolynn      | Maurice        |
| Royal Darwin Hospital                      | Fiona         | Rettie         |
| Royal Darwin Hospital                      | Madhivanan    | Sundaram       |
| Royal Darwin Hospital                      | Naomi         | Grimshaw       |
| Royal Hobart Hospital                      | Matthew       | Jose           |
| Royal Hobart Hospital                      | Gail          | Read           |
| Royal Melbourne Hospital                   | Jayne         | Amy            |
| Royal Melbourne Hospital                   | Patricia      | Coutts         |
| Royal Melbourne Hospital                   | Maria         | Presno         |
| Royal Melbourne Hospital                   | Nigel         | Toussaint      |
| Royal North Shore Hospital                 | Debbie        | Knagge         |
| Royal North Shore Hospital                 | Colleen       | Van Senden     |
| Royal North Shore Hospital                 | Linh          | Pham           |
| Royal North Shore Hospital                 | Muh Geot      | Wong           |
| Royal Prince Alfred Hospital               | Jane          | Nicholson      |
| Royal Prince Alfred Hospital               | Paul          | Snelling       |
| Sir Charles Gairdner Hospital              | Neil          | Boudville      |
| Sir Charles Gairdner Hospital              | Alison        | Farmer         |
| Sir Charles Gairdner Hospital              | Ingrid        | Holmes         |
| Sir Charles Gairdner Hospital              | Victoria      | Link           |
| Sir Charles Gairdner Hospital              | Vivien        | Perreau        |
| Sir Charles Gairdner Hospital              | Nicole        | Warnecke       |
| St George Hospital                         | Sunil         | Badve          |
| St George Hospital                         | Yanella       | Martinez-Smith |
| St George Hospital                         | Jayson        | Catiwa         |
| St Vincent's Hospital                      | Frank         | Ierino         |
| St Vincent's Hospital                      | Emmet         | O'flaherty     |
| Sunshine Coast Hospital and Health Service | Nicholas      | Gray           |
| Sunshine Coast Hospital and Health Service | Gerald        | Hilder         |
| Sunshine Coast Hospital and Health Service | Kaylene       | Wadd           |
| Sunshine Coast Hospital and Health Service | Andrea        | Pollock        |
| Sunshine Coast Hospital and Health Service | Stanley       | Searle         |
| Tamworth Hospital                          | Cheryl        | Wertheim       |

| Institution                            | First name   | Last name      |
|----------------------------------------|--------------|----------------|
| Tamworth Hospital                      | Stephen      | May            |
| Tamworth Hospital                      | Jill         | Telfer         |
| The George Institute for Global Health | Martin       | Gallagher      |
| The George Institute for Global Health | Sradha       | Kotwal         |
| The George Institute for Global Health | Sarah        | Coggan         |
| The George Institute for Global Health | Casey        | Yates          |
| The George Institute for Global Health | Kathryn      | Higgins        |
| The George Institute for Global Health | Earl         | James          |
| The George Institute for Global Health | Alison       | Coenen         |
| The George Institute for Global Health | Kris         | Rogers         |
| The George Institute for Global Health | Gian Luca    | Di Tanna       |
| The George Institute for Global Health | Jayanthi     | Mysore         |
| The George Institute for Global Health | Joseph Alvin | Santos         |
| The George Institute for Global Health | Benjamin     | Talbot         |
| The George Institute for Global Health | Katrina      | Thistlethwaite |
| The George Institute for Global Health | Bruce        | Neal           |
| Toowoomba Hospital                     | Elizabeth    | Coroneos       |
| Toowoomba Hospital                     | Shannon      | Nugent         |
| Toowoomba Hospital                     | Ian          | Fox            |
| Toowoomba Hospital                     | Sree         | Venuthurupalli |
| Western Health                         | Jennifer     | Connor         |
| Western Health                         | Ruth         | Thachaw        |
| Western Health                         | Sandra       | Crikis         |
| Wollongong Hospital                    | Pauline      | Byrne          |
| Wollongong Hospital                    | Karumathil   | Murali         |
| Wollongong Hospital                    | Hicham       | Cheikh Hassan  |
| Western Sydney Local Health District   | Lin          | Huang          |
| Western Sydney Local Health District   | Romiereeza   | Dizon          |
| Western Sydney Local Health District   | Deepika      | Joshi          |
| Western Sydney Local Health District   | Jon          | Mendoza        |
| Western Sydney Local Health District   | Bishi        | Augustine      |
| Western Sydney Local Health District   | Disha        | Balraj         |
| Western Sydney Local Health District   | Vincent      | Lee            |
| Western Sydney Local Health District   | David        | O'Donnell      |

## 2.2 Steering committee members

All above listed site investigators participated in the Steering Committee.

## 2.3 Trial Executive Management Committee members

Martin Gallagher; Sradha Kotwal; Sarah Coggan; Kevan Polkinghorne; Nicholas Gray; Girish Talaulikar; Alan Cass; Stephen McDonald; Stephen Jan

## 2.4 Data Collection Sub-committee members

Stephen McDonald; Sradha Kotwal; Sharad Ratanjee; Debbie Knagge, Marieke Veenendaal, Paul Snelling

## 2.5 Engagement Sub-committee members

Nicholas Gray; Sradha Kotwal; Girish Talaulikar; Suda Swaminathan; Leanne Brown; Karolynn Maurice; Maree Ross-Smith; Steve May

## 2.6 Interventions Sub-committee members

Kevan Polkinghorne; Sradha Kotwal; David Johnson; Emma Marsh; Madhivanan Sundaram; Peter Mount; Vincent Lee; Suda Swaminathan; Pamela Lopez-Vargas (representative of Caring for Australasians with Renal Impairment).

## 2.7 Study Adjudicators

Ben Talbot; David Semple; Peter Kerr; Matthew Roberts

The data collection tool was custom made for the REDUCTION study and was developed by The Project Factory (<https://www.theprojectfactory.com/>) together with The George Institute study team.

### 3 Statistical methods

#### 3.1 Randomisation methods

The participating services were divided into three balanced tranches using a covariate-based constrained randomisation over the trial intervention period. The allocation sequence was informed by the total number of catheters inserted in the baseline phase of the trial (December 2016 - January 2018). One hundred thousand random allocation sequences were generated, and those that achieved a degree of balance of no more than a 10% difference from the average number of dialysis catheters in the trial (between 73.2 - 89.8 average catheters per arm) were retained. Of the original sequences generated, 6,865 met our balance criteria, and the final randomisation allocation was chosen randomly from this subset.

#### 3.2 Details of Statistical Analysis

From the published Statistical Analysis Plan.<sup>1</sup>

The primary endpoint is the rate of infection events per 1,000 catheter days recorded by services. A generalised linear mixed model (a modified version of model-based approach)<sup>2</sup> was used to estimate the effect of treatment on infection rates:

$$\log(y_{ij}) = \mu + \alpha_i + \beta_j + X_{ij}\theta + \log(PT_{ij})$$

i.e. a multilevel Poisson regression.

Where  $Y_{ij}$  is the number of infections in cluster  $i$  at time  $j$  ( $y_{ij} = \sum_{k \in ij} y_{ijk}$ ).

$\alpha_i$  a service level random intercept. This is the difference of the infection rate of each service from the overall rate  $\mu$ .

$PT_{ij}$  is the accumulated person-time in service  $i$  and time  $j$ . This was calculated from individual patient data ( $PT_{ij} = \sum_{k \in ij} PT_{ijk}$ ). Patient time is the number of days between the latest data of either a) beginning of the time-period or b) entry of a patient to the service; and the earliest of a) end of time-period, b) death of the patient, c) exit of the patient from the service.

$\beta_j$  is fixed effect for time (classification variable with baseline time period as reference).

$X_{ij}$  is an indicator variable for service  $i$  receiving the intervention at time  $j$ , with  $\theta$  the effect estimate of receiving the intervention vs. receiving the control.

The two distributions are:

$$y \sim \text{Poisson}(\lambda)$$

$$\alpha \sim \text{Normal}(0, \sigma^2)$$

Distribution was selected based on AIC and BIC, with Poisson having the best fit according to both criteria over the negative binomial distribution. The distribution of residuals was checked with hanging rootogram plots and showed a good fit.



## **4 Trial interventions**

### **4.1 Details of trial interventions**

The interventions, developed by a trial Sub-committee, were informed by the most current evidence at the time of design, including the relevant Australian guideline, and were finalised in January 2018. A physician and nurse were identified at each renal service who were the local champions and were tasked with implementing the intervention at their service. A Data Safety Monitoring Committee was not convened for the project as the risk of harm from the interventions was considered low and participating services could view their rate of the trial primary outcome throughout. Local infection control processes were used to monitor any anti-microbial resistance.

### **4.2 Intervention implementation**

The use of antimicrobial dressings and locking solutions are reported in catheters that remained in situ for 28 or more days during the intervention phase. 3720 out of 3769 such catheters had an antimicrobial impregnated patch, sponge or disc applied while 1461 of the 3769 catheters used an antimicrobial locking solution.

## 5 Lay Summary

People with kidney failure can be treated with haemodialysis. Blood is filtered through a dialysis machine to remove toxins and water from the blood. Filtered blood is then returned to the body. Dialysis needs access to the bloodstream. Catheters are often used for this access.

A catheter is a soft plastic tube inserted under the skin into a vein in the neck or chest. The biggest concern with catheter use is the serious risk of catheter-related blood stream infection.

The REDUCTION study aimed to reduce the number of infections in patients who have catheters for dialysis. The trial introduced a standard process of care across the 37 kidney units in Australia who took part in this research. The study collected information on catheter use and infections for 12-18 months. Then the team introduced a standard process of care at all the sites over 18 months in a randomised fashion. The same information was collected from this point on for a further 12-18 months. The rate of catheter-related blood stream infections before and after the standard process of care were compared.

The study showed that the standard process of care did not reduce the number of infections. The rate of these infections is low in Australia. Despite this low rate, 1 in 10 patients who have a catheter for a year, will develop an infection.

## 6 Figures

### 6.1 Figure e1 - Trial Flow Chart

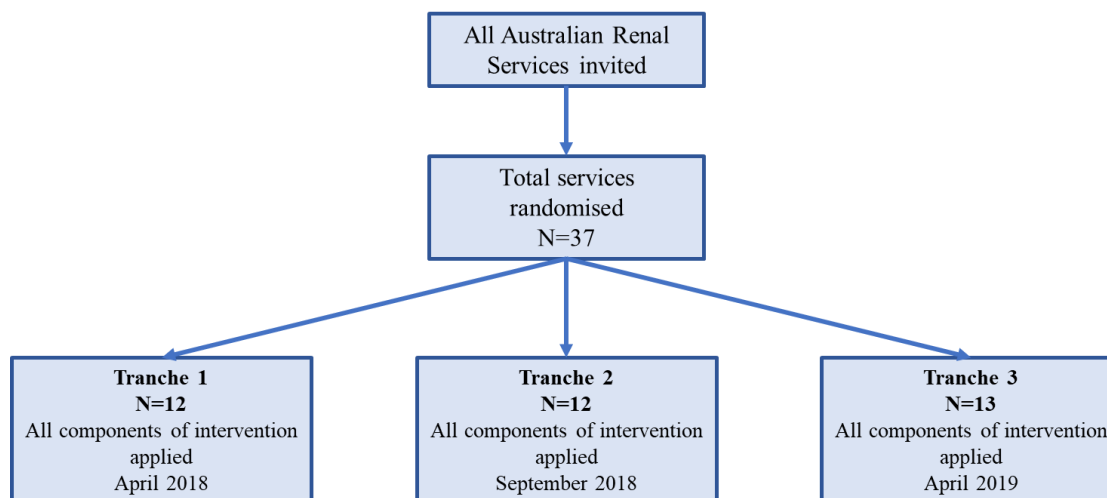

## 7 Appendix tables

### 7.1 Table e1 – Participating and Contributing entities

| <b>Partnering organisations</b>                                         |
|-------------------------------------------------------------------------|
| ANZDATA Registry                                                        |
| Department of Health and Human Services Victoria – Safer Care Victoria  |
| Kidney Health Australia                                                 |
| Kidney Health Australia- Caring for Australasians with Renal Impairment |
| Queensland Health                                                       |
| <b>Participating Renal Services</b>                                     |
| Alice Springs Hospital, Northern Territory                              |
| Alfred Health, Victoria                                                 |
| Armadale Hospital, Western Australia                                    |
| Austin Health, Victoria                                                 |
| Barwon Health, Victoria                                                 |
| Cairns Hospital, Queensland                                             |
| Canberra Hospital, Australian Capital Territory                         |
| Concord Hospital, New South Wales                                       |
| Eastern Health, Victoria                                                |
| Fiona Stanley Hospital, Western Australia                               |
| Flinders Medical Centre, South Australia                                |
| Gold Coast Hospital and Health Service, Queensland                      |
| John Hunter Hospital, New South Wales                                   |
| Liverpool Hospital, New South Wales                                     |
| Mater Hospital, Queensland                                              |
| Mackay Hospital, Queensland                                             |
| Metro South Hospital and Health Services, Queensland                    |
| Monash Health, Victoria                                                 |
| Nepean Hospital, New South Wales                                        |
| Prince of Wales Hospital, New South Wales                               |
| Rockhampton, Queensland                                                 |
| Royal Adelaide Hospital, South Australia                                |
| Royal Brisbane and Women’s Hospital, Queensland                         |
| Royal Darwin Hospital, Northern Territory                               |
| Royal Hobart Hospital, Tasmania                                         |
| Royal Melbourne Hospital, Victoria                                      |
| Royal North Shore Hospital, New South Wales                             |
| Royal Prince Alfred Hospital, New South Wales                           |
| Sir Charles Gairdner Hospital, Western Australia                        |
| St George Hospital, New South Wales                                     |
| St Vincent’s Hospital, Victoria                                         |
| Sunshine Coast Hospital and Health Service, Queensland                  |
| Tamworth Hospital, New South Wales                                      |
| Toowoomba Hospital, Queensland                                          |

Western Health, Victoria

---

Western Sydney Local Health District, New South Wales

---

Wollongong Hospital, New South Wales

---

## 7.2 Table e2 – Renal Service characteristics by their phase of randomisation

|                                                               | Tranche 1<br>(n=12) | Tranche 2<br>(n=12) | Tranche 3<br>(n=13) | Overall<br>(n=37)  |
|---------------------------------------------------------------|---------------------|---------------------|---------------------|--------------------|
| <b>Location</b>                                               |                     |                     |                     |                    |
| Metropolitan                                                  | 11 (91.7%)          | 8 (66.7%)           | 10 (76.9%)          | 29 (78.4%)         |
| Regional                                                      | 1 (8.3%)            | 4 (33.3%)           | 3 (23.1%)           | 8 (21.6%)          |
| <b>No of Satellite sites</b>                                  |                     |                     |                     |                    |
| More than 3                                                   | 5 (41.7%)           | 6 (50.0%)           | 5 (38.5%)           | 16 (43.2%)         |
| Less than or equal to 3                                       | 7 (58.3%)           | 6 (50.0%)           | 8 (61.5%)           | 21 (56.8%)         |
| <b>Renal Service size</b>                                     |                     |                     |                     |                    |
| Total dialysis patients as of 31 Dec 2016                     | 2,956               | 2,646               | 2,896               | 8,498              |
| N of catheters inserted per 12 months in baseline period*     | 90.2 (50.7; 127.9)  | 90.9 (62.8; 106.7)  | 78.9 (57.5; 128.2)  | 84.8 (57.5; 114.6) |
| N of catheters inserted per 12 months in intervention period* | 59.6 (39.5; 145.4)  | 75.8 (41.9; 105.0)  | 68.7 (51.1; 113.5)  | 71.2 (42.7; 116.3) |
| Total catheter days in each tranche across whole trial        | 397,201             | 378,601             | 375,2463            | 1,146,265          |
| <b>Changes made to standard practice</b>                      |                     |                     |                     |                    |
| Number of services that changed dressings n (%)               | 6 (50.0%)           | 1 (8.3%)            | 2 (15.4%)           | 9 (24.3%)          |
| Number of services that changed locking solutions n (%)       | 0 (0.0%)            | 2 (16.7%)           | 1 (7.7%)            | 3 (8.1%)           |

\*reported as medians with interquartile ranges.

## 7.3 Table e3 – Reasons for haemodialysis catheter removal

|                                                        | Baseline phase | Intervention phase |
|--------------------------------------------------------|----------------|--------------------|
| <b>Reason for Haemodialysis catheter removal*</b>      | <b>N=4,302</b> | <b>N=4,580</b>     |
| No longer required                                     | 2089 (48.6%)   | 2316 (50.6%)       |
| Poor catheter flow                                     | 450 (10.5%)    | 435 (9.5%)         |
| Extruded catheter cuff                                 | 61 (1.4%)      | 74 (1.6%)          |
| Suspected or confirmed Exit site infection             | 24 (0.6%)      | 30 (0.7%)          |
| Confirmed sepsis                                       | 150 (3.5%)     | 159 (3.5%)         |
| Possible sepsis                                        | 152 (3.5%)     | 145 (3.2%)         |
| Changed catheter site/type to reduce complication risk | 813 (18.9%)    | 739 (16.1%)        |
| Patient discharge from renal service                   | 179 (4.2%)     | 192 (4.2%)         |
| Patient death with catheter in-situ                    | 309 (7.2%)     | 350 (7.6%)         |
| Other                                                  | 75 (1.7%)      | 140 (3.1%)         |

\*A total for 8,882 catheters were removed during the course of the trial. The reasons for catheter removal reported here were as reported by the renal services at the time of catheter removal and prior to the adjudication process. Although the recommendations for management of haemodialysis catheter related blood stream infection were for the haemodialysis catheter to be removed, the final decision rested with the clinical team caring for the patient.

## 7.4 Table e4 – Unadjusted rates of all primary and secondary trial outcomes by trial phase

|                                        | Time point | Events / Time at risk (catheter days) in baseline group | Event rate during baseline (/1,000 catheter days) | Events / Time at risk (catheter days) in intervention group | Event rate during intervention (/1,000 catheter days) |
|----------------------------------------|------------|---------------------------------------------------------|---------------------------------------------------|-------------------------------------------------------------|-------------------------------------------------------|
| Confirmed HD-CRBSI                     | 0          | 122/314,742                                             | 0.39                                              |                                                             |                                                       |
|                                        | 1          | 22/117,311                                              | 0.19                                              | 18/64,522                                                   | 0.28                                                  |
|                                        | 2          | 14/65,822                                               | 0.21                                              | 38/134,279                                                  | 0.28                                                  |
|                                        | 3          |                                                         |                                                   | 101/449,589                                                 | 0.23                                                  |
| Suspected/possible CRBSI               | 0          | 36/314,742                                              | 0.11                                              |                                                             |                                                       |
|                                        | 1          | 19/117,311                                              | 0.16                                              | 2/64,522                                                    | 0.03                                                  |
|                                        | 2          | 7/65,822                                                | 0.11                                              | 19/134,279                                                  | 0.14                                                  |
|                                        | 3          |                                                         |                                                   | 61/449,589                                                  | 0.14                                                  |
| Confirmed and suspected/possible CRBSI | 0          | 158/314,742                                             | 0.50                                              |                                                             |                                                       |
|                                        | 1          | 41/117,311                                              | 0.35                                              | 20/64,522                                                   | 0.31                                                  |
|                                        | 2          | 21/65,822                                               | 0.32                                              | 57/134,279                                                  | 0.42                                                  |
|                                        | 3          |                                                         |                                                   | 162/449,589                                                 | 0.36                                                  |
| All infectious events                  | 0          | 218/314,742                                             | 0.69                                              |                                                             |                                                       |
|                                        | 1          | 62/117,311                                              | 0.53                                              | 22/64,522                                                   | 0.34                                                  |
|                                        | 2          | 40/65,822                                               | 0.61                                              | 71/134,279                                                  | 0.53                                                  |
|                                        | 3          |                                                         |                                                   | 230/449,589                                                 | 0.51                                                  |

Time points are defined as 0 – all services in baseline phase; 1 – first tranche (12 services) of intervention implemented; 2 – second tranche implemented with total of 24 services in intervention phase; 3 – final tranche implemented with all services in intervention phase; HD-CRBSI: Haemodialysis catheter-related blood stream infection; CRBSI: catheter-related blood stream infection



## 7.5 Table e5 – Sub-group analyses

|                                                          | Confirmed HD-CRBSI events in<br>baseline phase/1000 catheter days <sup>1</sup> | Confirmed HD-CRBSI events in<br>intervention phase/1000 catheter days | Rate Ratio (95% CI) | P value for interaction |
|----------------------------------------------------------|--------------------------------------------------------------------------------|-----------------------------------------------------------------------|---------------------|-------------------------|
| <b>Enrolling renal service size</b>                      |                                                                                |                                                                       |                     |                         |
| Greater than or equal to the median (<63)                | 0.34                                                                           | 0.27                                                                  | 1.46 (0.88 - 2.43)  | 0.34                    |
| Below the median (>63)                                   | 0.27                                                                           | 0.19                                                                  | 1.14 (0.62 - 2.08)  |                         |
| <b>Baseline renal service practice</b>                   |                                                                                |                                                                       |                     |                         |
| Concordant with using a dressing or locking solution     | 0.27                                                                           | 0.22                                                                  | 1.38 (0.83 - 2.30)  | 0.61                    |
| Not concordant with using a dressing or locking solution | 0.46                                                                           | 0.30                                                                  | 1.22 (0.68 - 2.17)  |                         |

<sup>1</sup> Total number of events (one catheter can contribute more than one event); HD-CRBSI: Haemodialysis catheter-related blood stream infection; CI: confidence interval

## 8 References

1. Kotwal S, Gallagher M, Rogers K, Di Tanna GL. REDUcing the burden of dialysis Catheter ComplicaTIOns: a National approach (REDUCTION) - statistical analysis plan. <https://osf.io/gnw3u/>. Published 2020. Accessed Dec 15, 2020.
2. Hussey MA, Hughes JP. Design and analysis of stepped wedge cluster randomized trials. *Contemporary clinical trials*. 2007;28(2):182-191.
